# Supplementary material for: The microbiome diversifies N-acyl lipid pools - including short-chain fatty acid-derived compounds
Source: PubMed Central journal article supplement (PMC11565975; doi:10.1101/2024.10.31.621412), 2024-11-02
Supplement: media-1.pdf [file media-1.pdf]

1 **Title:** The microbiome diversifies *N*-acyl lipid pools - including short-chain fatty acid-  
2 derived compounds.

3

4 **Authors:**

5 Helena Mannocho-Russo<sup>1</sup>, Vincent Charron-Lamoureux<sup>1</sup>, Martijn van Faassen<sup>1,2</sup>,  
6 Santosh Lamichhane<sup>1,3</sup>, Wilhan D. Gonçalves Nunes<sup>1</sup>, Victoria Deleray<sup>1</sup>, Abubaker  
7 Patan<sup>1</sup>, Kyle Vittali<sup>1</sup>, Prajit Rajkumar<sup>1</sup>, Yasin El Abiead<sup>1</sup>, Haoqi Nina Zhao<sup>1</sup>, Paulo  
8 Wender Portal Gomes<sup>1</sup>, Ipsita Mohanty<sup>1</sup>, Carlynda Lee<sup>1</sup>, Aidan Sund<sup>1</sup>, Meera Sharma<sup>1</sup>,  
9 Yuanhao Liu<sup>1</sup>, David Pattynama<sup>1</sup>, Gregory T. Walker<sup>4</sup>, Grant J. Norton<sup>4</sup>, Lora Khatib<sup>5,6</sup>,  
10 Mohammadsobhan S. Andalibi<sup>5,7,8,9</sup>, Crystal X. Wang<sup>8,9</sup>, Ronald J. Ellis<sup>7,9</sup>, David J.  
11 Moore<sup>8,9</sup>, Jennifer E. Iudicello<sup>8,9</sup>, Donald Franklin, Jr.<sup>8,9</sup>, Scott Letendre<sup>9,10</sup>, Loryn  
12 Chin<sup>5,11,12</sup>, Corinn Walker<sup>5</sup>, Simone Renwick<sup>5,13</sup>, Jasmine Zemlin<sup>1,12</sup>, Michael J. Meehan<sup>1</sup>,  
13 Xinyang Song<sup>14,15</sup>, Dennis Kasper<sup>14</sup>, Zachary Burcham<sup>16</sup>, Jane J. Kim<sup>17,18</sup>, Sejal  
14 Kadakia<sup>19</sup>, Manuela Raffatellu<sup>4,12,20</sup>, Lars Bode<sup>5,13</sup>, Karsten Zengler<sup>5,11,12</sup>, Mingxun  
15 Wang<sup>21</sup>, Dionicio Siegel<sup>1</sup>, Rob Knight<sup>5,12,22,23,24</sup>, Pieter C. Dorrestein<sup>1,12,25,26</sup>

16

17 **Author affiliations:**

18 <sup>1</sup> Skaggs School of Pharmacy and Pharmaceutical Sciences, University of California San  
19 Diego, La Jolla, CA, USA

20 <sup>2</sup> Department of Laboratory Medicine, University of Groningen, University Medical Center  
21 Groningen, 9713 GZ Groningen, the Netherlands

22 <sup>3</sup> Turku Bioscience Center, University of Turku and Åbo Akademi University, 20520 Turku,  
23 Finland

24 <sup>4</sup> Division of Host-Microbe Systems & Therapeutics, Department of Pediatrics, University  
25 of California San Diego, La Jolla, CA 92093, USA

26 <sup>5</sup> Department of Pediatrics, University of California San Diego, La Jolla, California, USA

27 <sup>6</sup> Neurosciences Graduate Program, University of California San Diego, La Jolla,  
28 California, USA

29 <sup>7</sup> Department of Neurosciences, University of California San Diego, San Diego, CA  
30 92093, USA

31 <sup>8</sup> Department of Psychiatry, University of California San Diego, San Diego, CA 92093,  
32 USA

33 <sup>9</sup> HIV Neurobehavioral Research Program, University of California San Diego, San Diego,  
34 CA 92093, USA

35 <sup>10</sup> Department of Medicine, University of California San Diego, La Jolla, CA, USA

36 <sup>11</sup> Department of Bioengineering, University of California, San Diego, La Jolla, CA, 92093,  
37 USA

38 <sup>12</sup> Center for Microbiome Innovation, University of California, San Diego, La Jolla, CA,  
39 92093, USA

40 <sup>13</sup> Larsson-Rosenquist Foundation Mother-Milk-Infant Center of Research Excellence  
41 (MOMI CORE) and the Human Milk Institute (HMI), University of California San Diego, La  
42 Jolla, CA, 92093, USA

43 <sup>14</sup> Department of Immunology, Harvard Medical School, Boston, MA 02115, USA

44 <sup>15</sup> Key Laboratory of Multi-Cell Systems, Shanghai Institute of Biochemistry and Cell  
45 Biology, Center for Excellence in Molecular Cell Science, Chinese Academy of Sciences,  
46 University of Chinese Academy of Sciences, Shanghai, 200031, China

47 <sup>16</sup> Department of Microbiology, University of Tennessee, Knoxville, Tennessee, USA

48 <sup>17</sup> Department of Pediatrics, Division of Pediatric Endocrinology, University of California  
49 San Diego, California, USA

50 <sup>18</sup> Rady Children's Hospital San Diego, San Diego, California, USA

51 <sup>19</sup> Division of Pediatric Endocrinology, Children's Hospital of Orange County, Orange, CA,  
52 USA

53 <sup>20</sup> Chiba University-UC San Diego Center for Mucosal Immunology, Allergy, and  
54 Vaccines, La Jolla, California 92093, USA

55 <sup>21</sup> Department of Computer Science and Engineering, University of California Riverside,  
56 Riverside, CA, USA

57 <sup>22</sup> Department of Computer Science and Engineering, University of California, San Diego,  
58 La Jolla, CA, USA

59 <sup>23</sup> Halicioğlu Data Science Institute, University of California, San Diego, La Jolla, CA, USA

60 <sup>24</sup> Shu Chien-Gene Lay Department of Bioengineering, University of California, San  
61 Diego, La Jolla, CA, USA

62 <sup>25</sup> Collaborative Mass Spectrometry Innovation Center, Skaggs School of Pharmacy and  
63 Pharmaceutical Sciences, University of California San Diego, La Jolla, CA, USA

64 <sup>26</sup> Department of Pharmacology, University of California San Diego, La Jolla, CA, 92093,  
65 USA

66

67 \*Correspondence: [pdorrestein@health.ucsd.edu](mailto:pdorrestein@health.ucsd.edu)

68

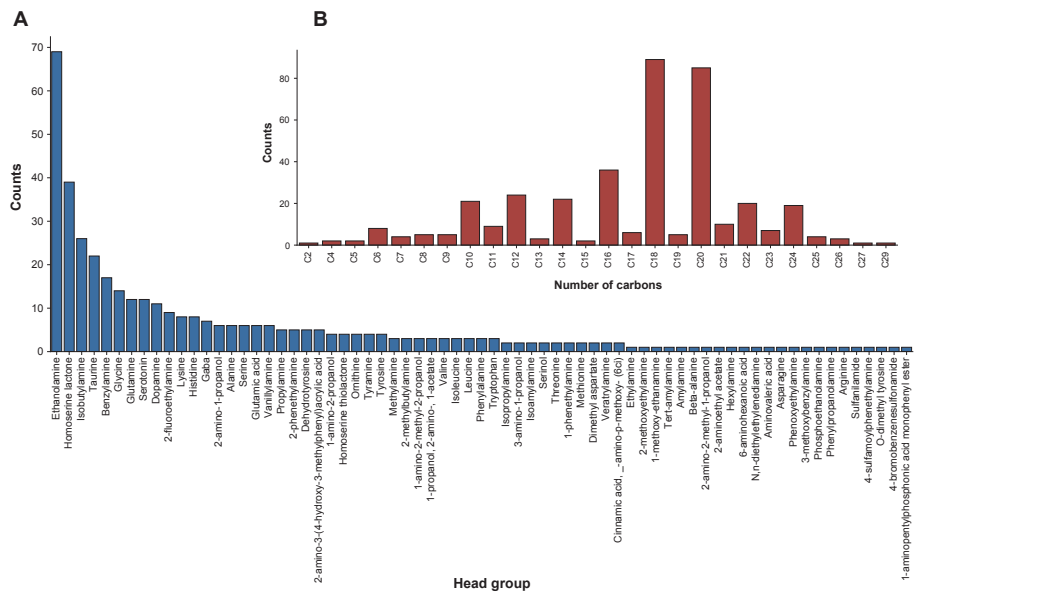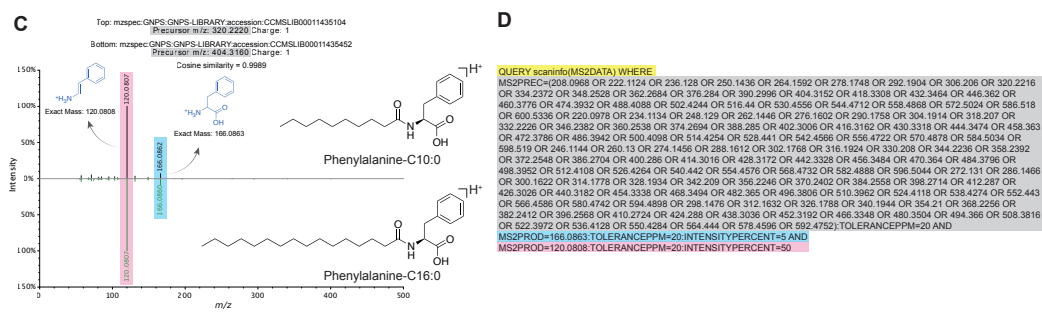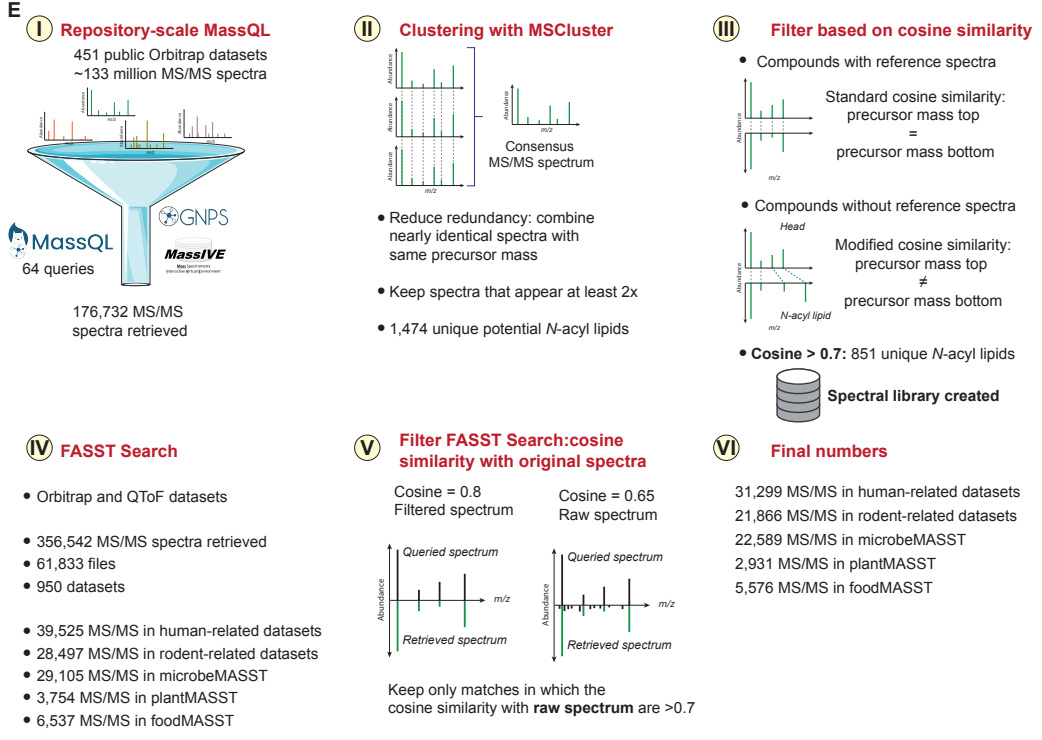

69  
70  
71

**Supplementary Figure 1. Distribution of N-acyl lipids in structural databases and mass spectrometry repository searches, related to Figure 1. A) Diversity and relative frequency of N-acyl**

72 lipids headgroups and **(B)** lipid chain lengths documented in LIPID MAPS. This analysis excludes ceramide  
73 acylations. **(C)** *N*-acyl lipid query strategy: representative MS/MS spectrum of phenylalanine-C10:0  
74 (CCMSLIB00011435104) and phenylalanine-C16:0 (CCMSLIB00011435452). The spectra show nearly  
75 identical fragmentation patterns enabling the creation of the MassQL query to retrieve the MS/MS spectra  
76 of this family of lipids. **(D)** MassQL query for phenylalanine headgroup where we initiate to return all MS/MS  
77 spectra (in yellow) that fulfill the following criteria: the precursor ion has to match one of the expected  
78 precursor *m/z* values specified (gray), as well as the most diagnostic *m/z* fragments of the head portion  
79 (blue and pink) with their indicated error tolerances and minimum relative intensities. **(E)** Strategy followed  
80 to create the *N*-acyl lipids library and expand to biological interpretations. (I) MassQL queries were designed  
81 and run against the Orbitrap datasets in the GNPS/MassIVE repository. (II) The spectra were clustered  
82 using MSCluster to reduce redundancy. (III) A cosine similarity filter was applied to keep the higher  
83 confidence *N*-acyl lipids spectra. (IV) The clustered spectra were searched using FASST searches against  
84 the whole repository (including Orbitrap and QToF datasets), and human and rodent-related datasets were  
85 tagged using ReDU, and microbial, plant, and food-related datasets were also tagged using domain-specific  
86 MASSTs. (V) The spectra retrieved from the FASST searches were filtered to keep the matches in which  
87 the raw (unfiltered) spectra resulted in cosine similarity above 0.7. (VI) Summary of the results obtained  
88 with this workflow. Icons were obtained from Bioicons.com.

89



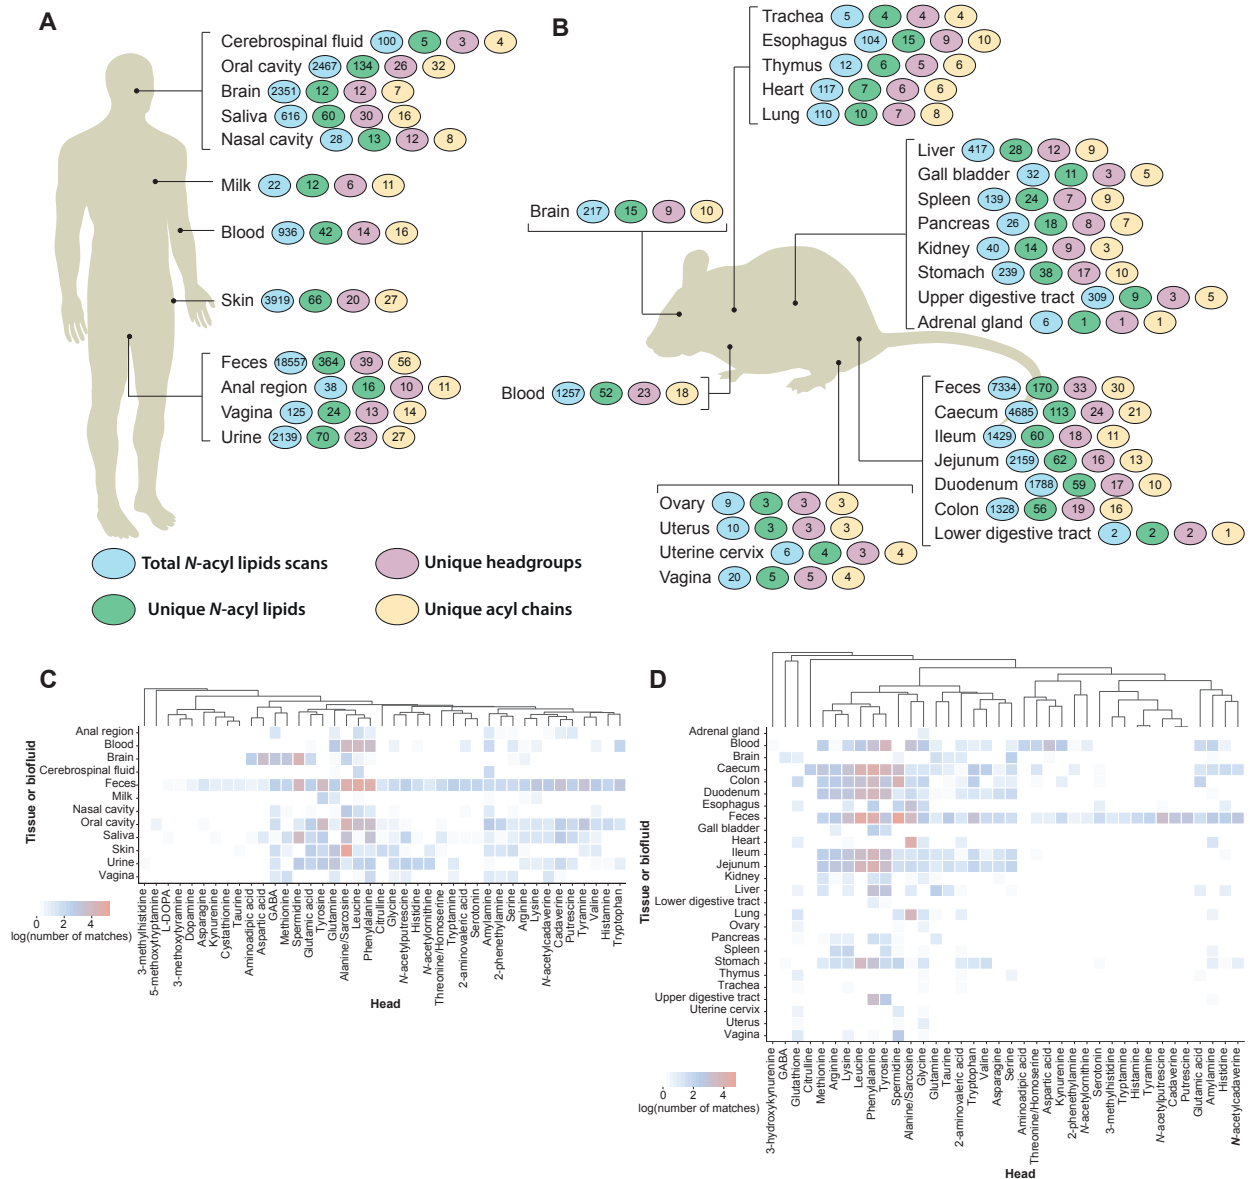

90  
 91 **Supplementary Figure 2. Distribution of *N*-acyl lipids obtained from FASST searches among**  
 92 **different tissues or biofluids, related to Figure 1.** Summary of the occurrences in the public domain in  
 93 **(A)** human and **(B)** rodent-related datasets. Heatmaps show the distribution of the number of matches  
 94 grouped by headgroup in different tissues and biofluids with metadata available in ReDU for **(C)** human and  
 95 **(D)** rodent-related public datasets. All heatmaps are shown as log values of the matches obtained from the  
 96 repository. Icons were obtained from Bioicons.com.  
 97

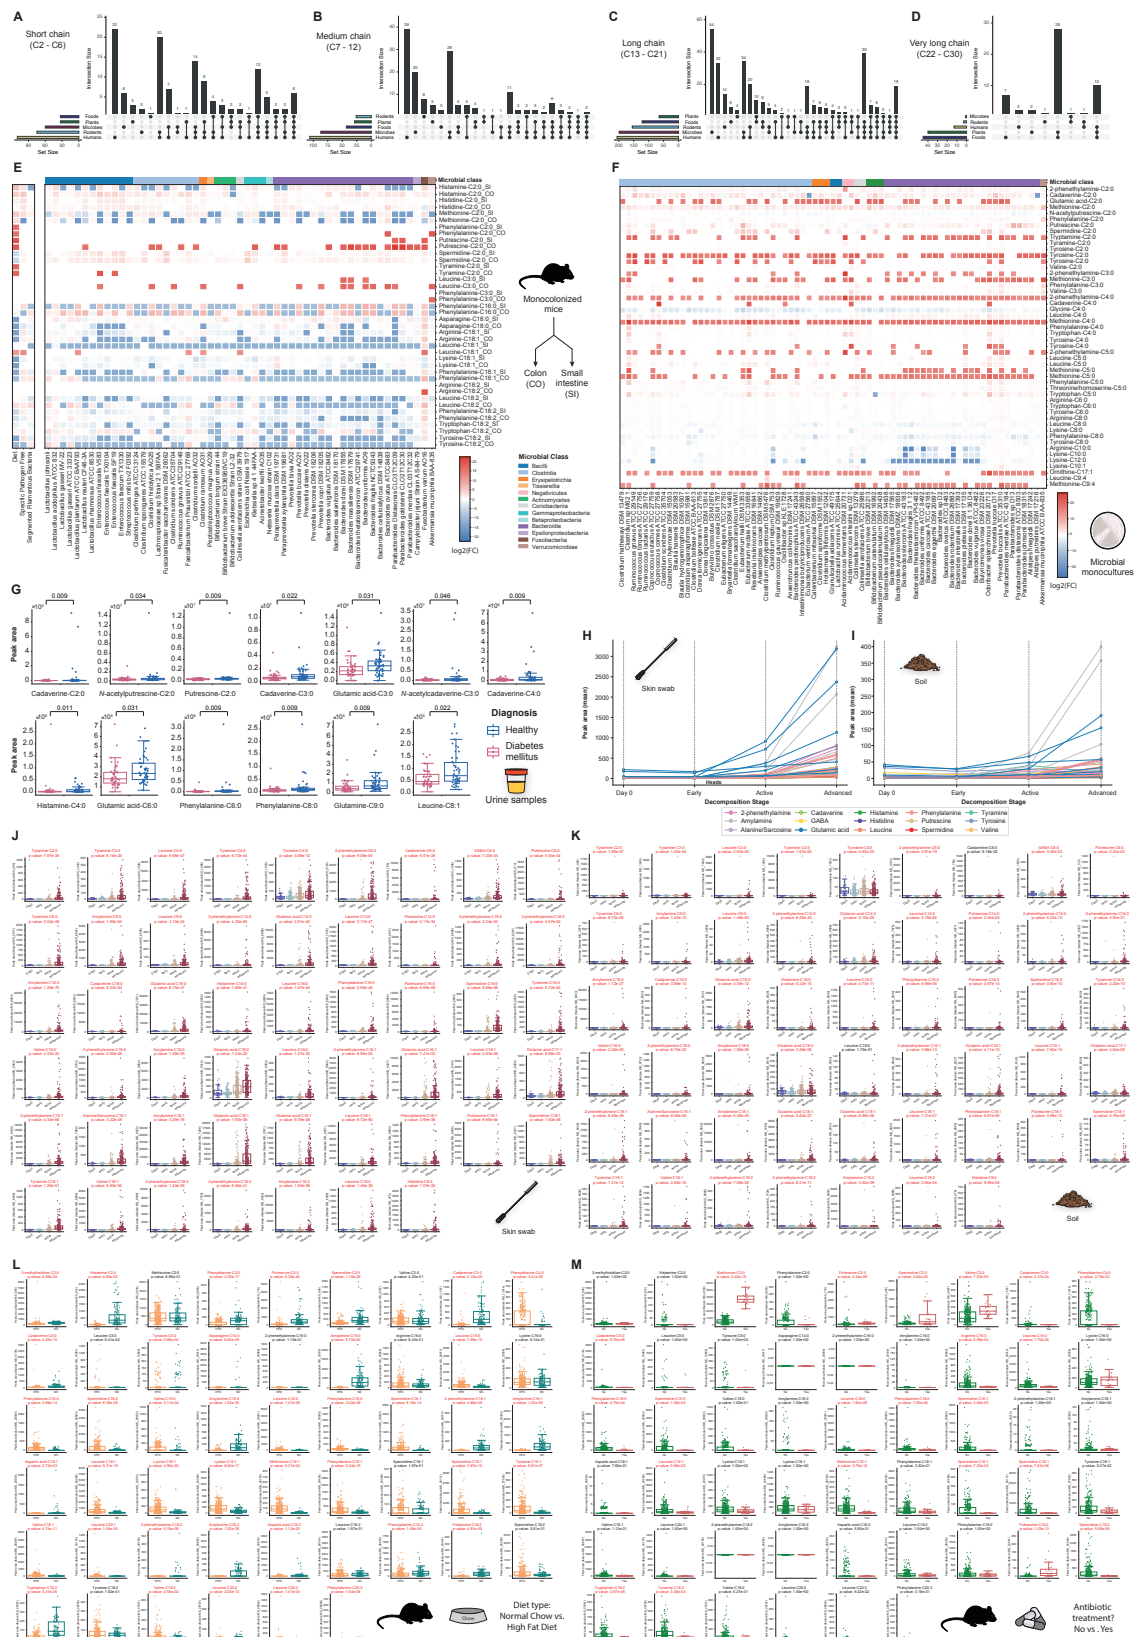

98  
99  
100

**Supplementary Figure 3. N-acyl lipids chain length diversity, evidence of microbial N-acyl lipids, and reanalysis of public datasets, related to Figure 2. Distribution of N-acyl lipids in public data stratified**

101 by chain length classes. Upset plots show the number of unique *N*-acyl lipids attached to **(A)** short, **(B)**  
102 medium, **(C)** long, and **(D)** very long chain fatty acids. **(E)** Reanalysis of a public dataset of monocolonized  
103 GF mice (GNPS/MassIVE: [MSV000088040](#), deposited in 2021)<sup>1,2</sup>. Heatmap log<sub>2</sub> fold changes (FCs) of the  
104 *N*-acyl lipids matches in colon and small intestine samples of monocolonized mice relative to germ-free  
105 (GF) mice. Values of the diet, Specific Pathogen Free (SPF) mice, and of mice colonized with Segmented  
106 Filamentous Bacteria (SFB) are also shown. Red cells indicate compounds that are increasing relative to  
107 GF, while blue cells indicate compounds that are decreasing relative to GF mice. The x-axis is taxonomically  
108 ordered according to the NCBI Taxonomy ID. **(F)** Heatmap showing the log<sub>2</sub> fold change of *N*-acyl lipids  
109 matches in microbial monocultures of gut commensal microbes relative to the culture media. Red cells  
110 indicate compounds that are increasing, while blue cells indicate compounds that are decreasing relative  
111 to the media. The x-axis is taxonomically ordered according to the NCBI Taxonomy ID. **(G)** Peak area  
112 abundances of *N*-acyl lipids annotated in a public dataset (GNPS/MassIVE: [MSV000082261](#)) from urine  
113 samples across clinical groups of healthy and type I diabetes mellitus. Only *N*-acyl lipids with p-values of  
114 0.05 or less are shown. Healthy, *n* = 52; Diabetes (type 1), *n* = 44. **(H,I)** *N*-acyl lipids annotated from a  
115 public dataset (GNPS/MassIVE: [MSV000084322](#), [MSV000084463](#)) of **(H)** skin swabs and **(I)** soil samples  
116 of a human cadaver decomposition study.<sup>3</sup> The parallel coordinates plots show the mean of the *N*-acyl  
117 lipids peak areas obtained for the different headgroups in each of the stages of decomposition. Each line  
118 represents a *N*-acyl lipid match. **(J,K)** Peak area abundances of *N*-acyl lipids annotated in public datasets  
119 from **(J)** skin (GNPS/MassIVE: [MSV000084322](#)) and **(K)** soil (GNPS/MassIVE: [MSV000084463](#)) samples  
120 across different stages of decomposition of human bodies.<sup>3</sup> Skin: Day0, *n* = 36; Early, *n* = 171; Active, *n* =  
121 292; Advanced, *n* = 249. Soil: Day0, *n* = 36; Early, *n* = 171; Active, *n* = 299; Advanced, *n* = 252. **(L,M)** Peak  
122 area abundances of *N*-acyl lipids annotated in a public dataset (GNPS/MassIVE: [MSV000080918](#))<sup>4</sup> from  
123 mice fecal samples of mice subjected to different diets **(L)** and treatment with a cocktail of antibiotics **(M)**.  
124 Antibiotics: No, *n* = 310; Yes, *n* = 27. Diet: HFD, *n* = 310; NC, *n* = 114. For the antibiotics plot, only mice  
125 fed with HFD were considered. All boxplots indicate the first (lower), median, and third (upper) quartiles,  
126 while whiskers are 1.5 times the interquartile range. Significance was tested in cases where two groups  
127 were compared using the non-parametric two-sided Mann-Whitney U test, while for more than two groups  
128 the non-parametric Kruskal-Wallis test was used, and p-values were corrected for multiple comparisons  
129 using the Benjamini-Hochberg correction. Compounds with p-values below 0.05 are highlighted in red.  
130 Icons were obtained from Bioicons.com.

131

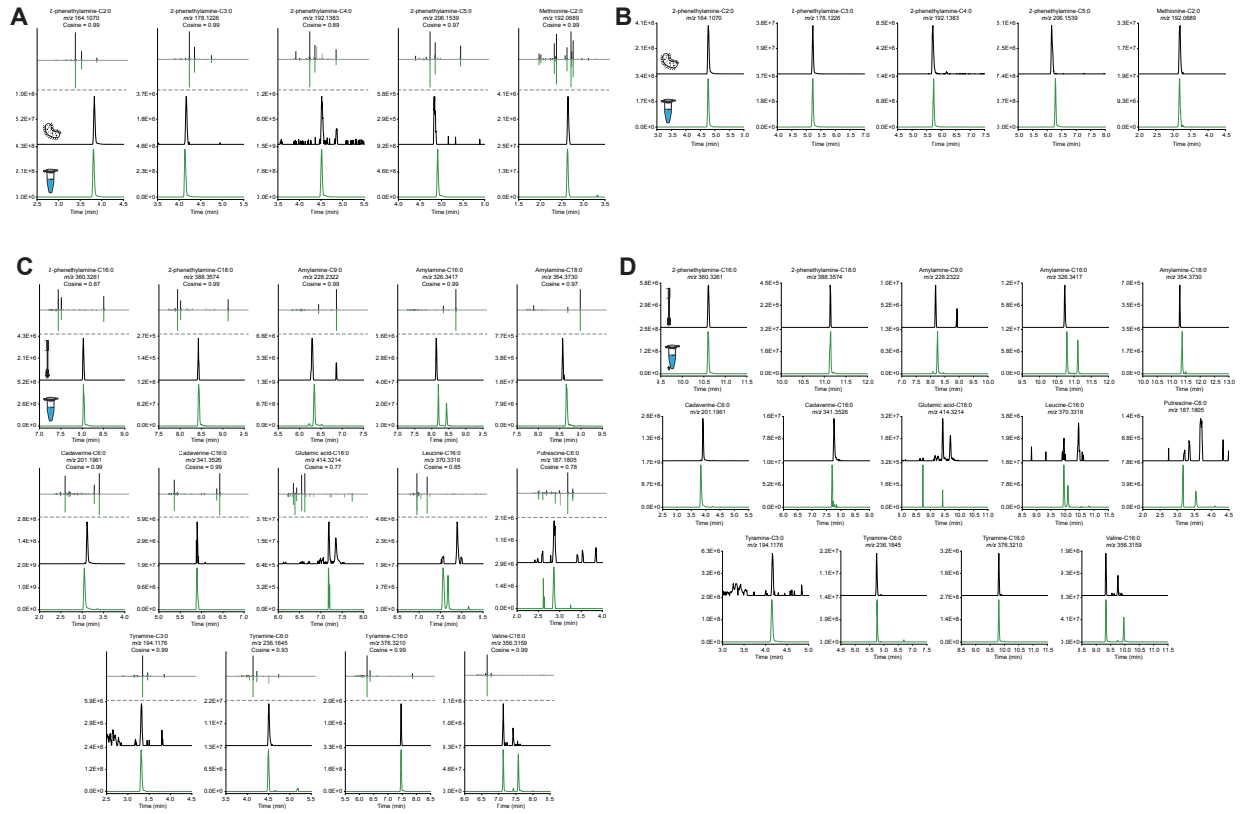

132  
133  
134  
135  
136  
137  
138  
139  
140  
141  
142  
143  
144  
145  
146  
147  
148  
149

**Supplementary Figure 4. MS/MS and retention time matching of *N*-acyl lipids in samples from the microbial monocultures and from the body decomposition study, related to Figure 2. (A) MS/MS mirror plots and retention time matches to *N*-acyl lipids obtained via combinatorial synthesis. MS/MS spectra on the top (black) represent spectra detected in the microbial monocultures experiment (Supplementary Figure 3F). An unusual series of *N*-acyl 2-phenethylamines was observed and confirmed in level 1 annotation<sup>5,6</sup> in two different chromatographic methods: LC1 (A) and LC2 (B) - see Methods. Chromatographic traces represent the exported ion chromatograms for each compound (black: sample; green: standard). (C) MS/MS mirror plots and retention time matches to *N*-acyl lipids obtained via combinatorial synthesis. MS/MS spectra on the top (black) represent spectra detected in the body decomposition study (Supplementary Figure 3H-K). Chromatographic traces represent the exported ion chromatograms for each compound (black: sample; green: standard) in two different chromatographic methods: LC1 (C) and LC2 (D) - see Methods. MS/MS mirror plots can be interactively inspected in the Metabolomics Spectrum Resolver<sup>7</sup> with the information provided in Supplementary Table S2.**

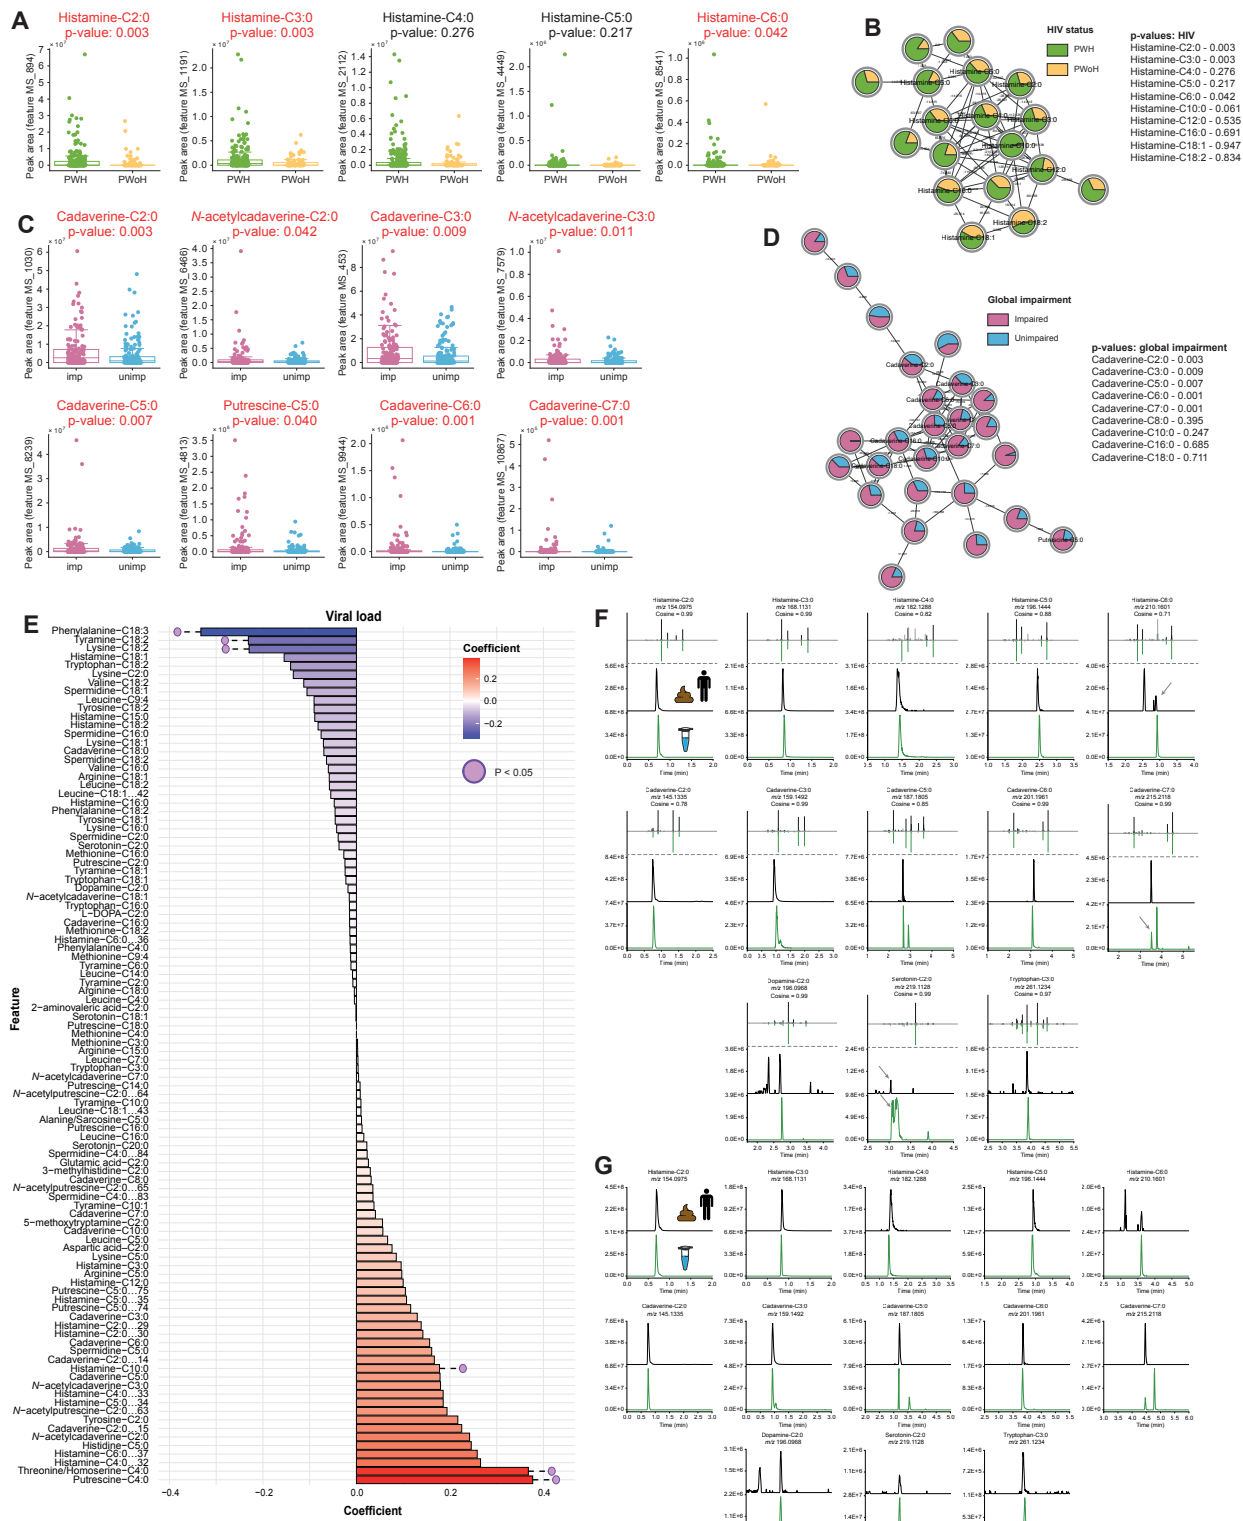

150  
 151 **Supplementary Figure 5. N-acyl lipids associated with HIV status, HIV plasma viral load, and**  
 152 **neurocognitive impairment status, related to Figure 3. (A) Peak area abundances of N-acyl histamines**  
 153 **in people with HIV (PWH) and people without HIV (PWOH) (PWH,  $n = 228$ ; PWOH,  $n = 93$ ). (B) Molecular**  
 154 **network obtained for histamine N-acyl lipids. (C) Peak area abundances of N-acyl polyamines in cognitively**

155 impaired and normal participants (impaired,  $n = 151$ ; unimpaired,  $n = 162$ ) of the HNRC. **(D)** Molecular  
156 network obtained for *N*-acyl cadaverines. Boxplots indicate the first (lower), median, and third (upper)  
157 quartiles, while whiskers are 1.5 times the interquartile range. Significance was tested using the non-  
158 parametric two-sided Mann-Whitney U test. The p-values shown are nominal p-values, and the adjusted  
159 ones (for multiple comparisons using Benjamini-Hochberg) are also available in **Supplementary Table S3**.  
160 The molecular networks were created using the Feature-Based Molecular Networking workflow<sup>8</sup> within the  
161 GNPS environment<sup>9</sup>. The nodes are annotated based on spectral similarity matches with the *N*-acyl lipids  
162 library created. The nodes represent each MS/MS spectrum, while the edges connecting them represent  
163 their spectral similarity (threshold set to cosine > 0.7). Pie charts indicate the relative abundance of ion  
164 features in each group highlighted. This dataset is publicly available in GNPS/MassIVE under the accession  
165 number [MSV000092833](https://massive.ucsd.edu/MSV000092833). **(E)** Bar plots showing the correlation coefficients for the association between HIV  
166 RNA viral load and various *N*-acyl lipids in the PWH ( $n = 203$ ). Red bars represent positive correlations,  
167 while blue bars represent negative correlations, as determined by linear regression models. The p-values  
168 shown are nominal; adjusted p-values (corrected for multiple comparisons using the Benjamini-Hochberg  
169 method) are available in **Supplementary Table S3**. **(F)** MS/MS mirror plots and retention time matches to  
170 the pure *N*-acyl lipids standards. MS/MS spectra on the top (black) represent the ones detected in the  
171 HNRC fecal samples, while the MS/MS on the bottom (green) are the ones obtained from the standards.  
172 Chromatographic traces represent the exported ion chromatograms for each compound (black: sample;  
173 green: standard). The chromatographic method LC1 (see **Methods**) was used. MS/MS mirror plots can be  
174 interactively inspected in the Metabolomics Spectrum Resolver<sup>7</sup> with the information provided in  
175 **Supplementary Table S3**. **(G)** Chromatographic traces represent the exported ion chromatograms for each  
176 compound (black: sample; green: standard), with data acquired in a different chromatographic method: LC2  
177 (see **Methods**).

178  
179

## 180 **References**

- 181 1. Wu, M. *et al.* Gut complement induced by the microbiota combats pathogens and  
182 spares commensals. *Cell* **187**, 897–913.e18 (2024).
- 183 2. Song, X. *et al.* Gut microbial fatty acid isomerization modulates intraepithelial T  
184 cells. *Nature* **619**, 837–843 (2023).
- 185 3. Burcham, Z. M. *et al.* A conserved interdomain microbial network underpins  
186 cadaver decomposition despite environmental variables. *Nat Microbiol* **9**, 595–613  
187 (2024).
- 188 4. Shalpour, S. *et al.* Inflammation-induced IgA+ cells dismantle anti-liver cancer  
189 immunity. *Nature* **551**, 340–345 (2017).
- 190 5. Sumner, L. W. *et al.* Proposed minimum reporting standards for chemical analysis  
191 Chemical Analysis Working Group (CAWG) Metabolomics Standards Initiative  
192 (MSI). *Metabolomics* **3**, 211–221 (2007).
- 193 6. Schymanski, E. L. *et al.* Identifying small molecules via high resolution mass  
194 spectrometry: communicating confidence. *Environ. Sci. Technol.* **48**, 2097–2098

- 195 (2014).
- 196 7. Bittremieux, W. *et al.* Universal MS/MS Visualization and Retrieval with the  
197 Metabolomics Spectrum Resolver Web Service. *bioRxiv* 2020.05.09.086066 (2020)  
198 doi:10.1101/2020.05.09.086066.
- 199 8. Nothias, L.-F. *et al.* Feature-based molecular networking in the GNPS analysis  
200 environment. *Nat. Methods* **17**, 905–908 (2020).
- 201 9. Wang, M. *et al.* Sharing and community curation of mass spectrometry data with  
202 Global Natural Products Social Molecular Networking. *Nat. Biotechnol.* **34**, 828–837  
203 (2016).
- 204
